# Supplementary material for: Multivariate Optimization of Chromatographic Conditions for Rapid Simultaneous Quantification of Antidiarrheal Drugs in Formulation Using Surface Response Methodology
Source: MDPI journal article supplement (doi:10.3390/separations9050103), 2022-04-21
Supplement: s1 [file s1]

Archive with 1 entries (1 files):
- separations-1690780-supplementary.pdf
