# Supplementary material for: Multivariate Optimization of Chromatographic Conditions for Rapid Simultaneous Quantification of Antidiarrheal Drugs in Formulation Using Surface Response Methodology
Source: MDPI journal article supplement (doi:10.3390/separations9050103), 2022-04-21
Supplement: s1 [file s1 › separations-1690780-supplementary.pdf]

**Multivariate optimization of chromatographic conditions for rapid simultaneous quantification of antidiarrheal drugs in formulation using surface response methodology**

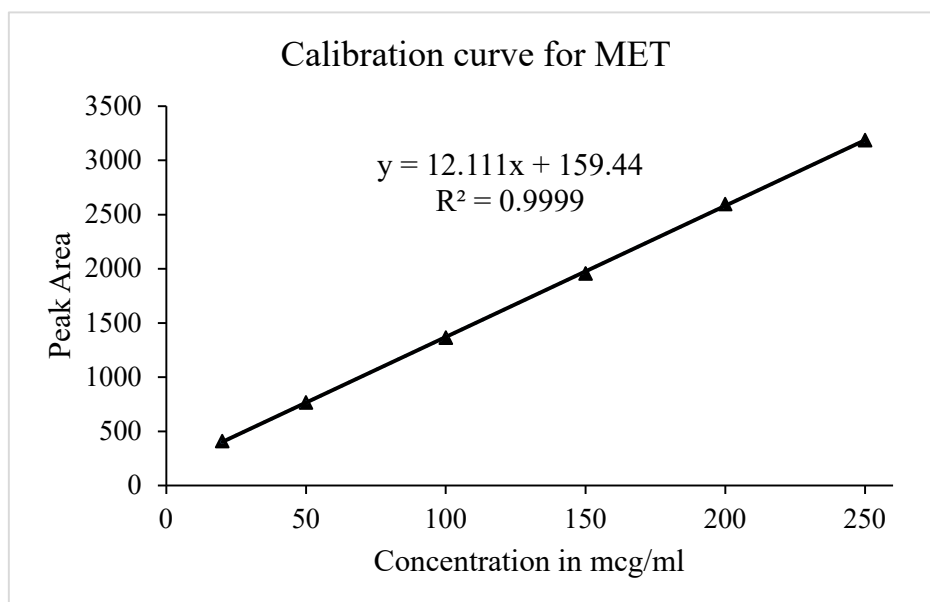

Figure S1: Calibration curve for metronidazole

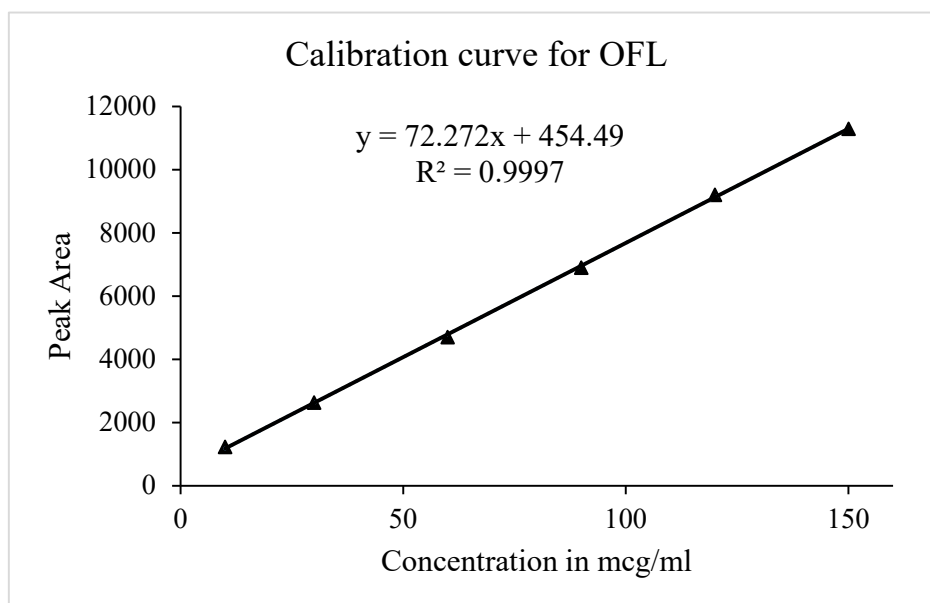

Figure S2: Calibration curve for ofloxacin

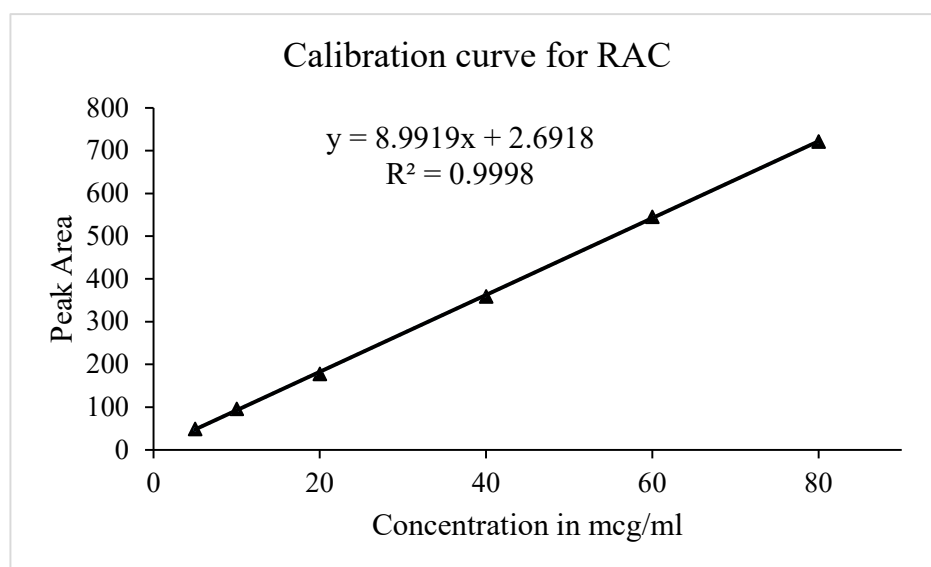

Figure S3: Calibration curve for racecadotril

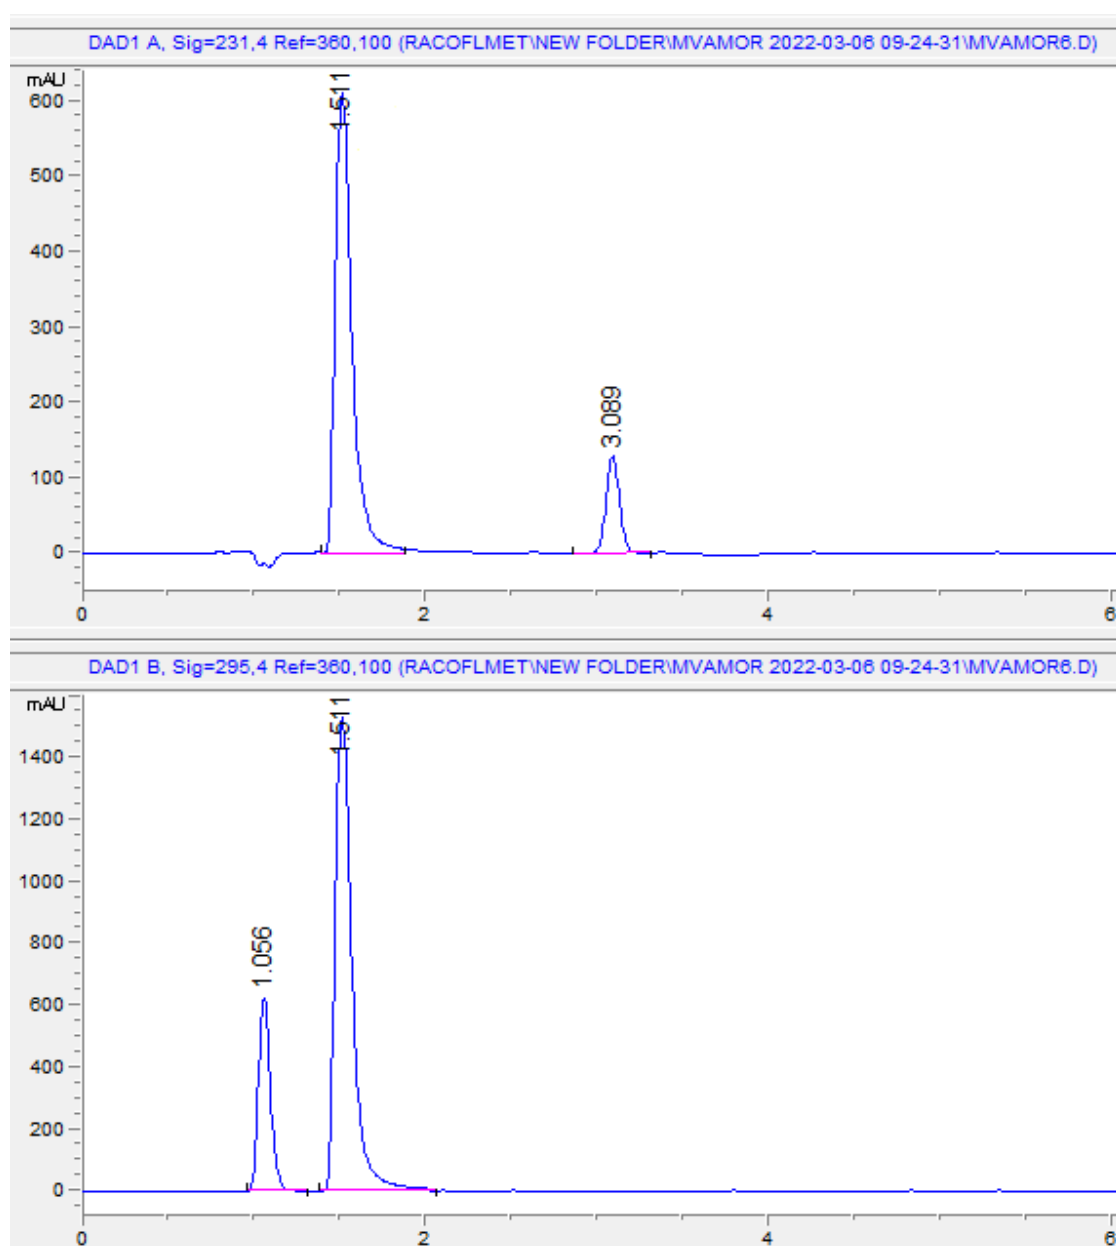

Figure S4: Chromatogram of standard solutions of MET(1.056 min), OFL (1.511 min) and RAC (3.089 min)

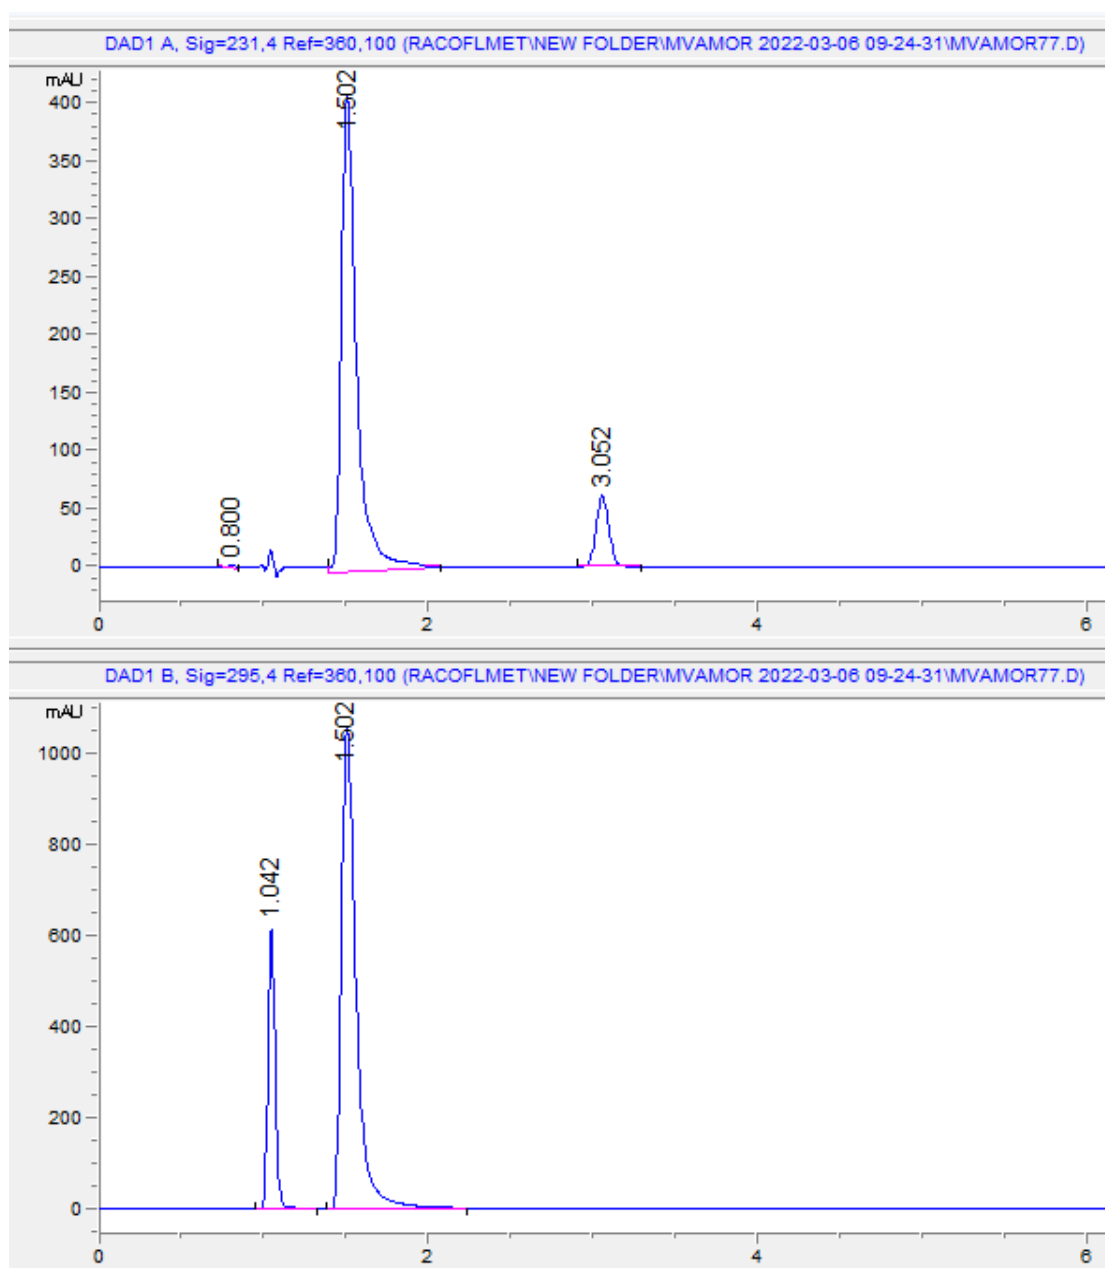

Figure S5: Chromatogram of sample solutions of MET(1.042 min), OFL (1.502 min) and RAC (3.052 min)

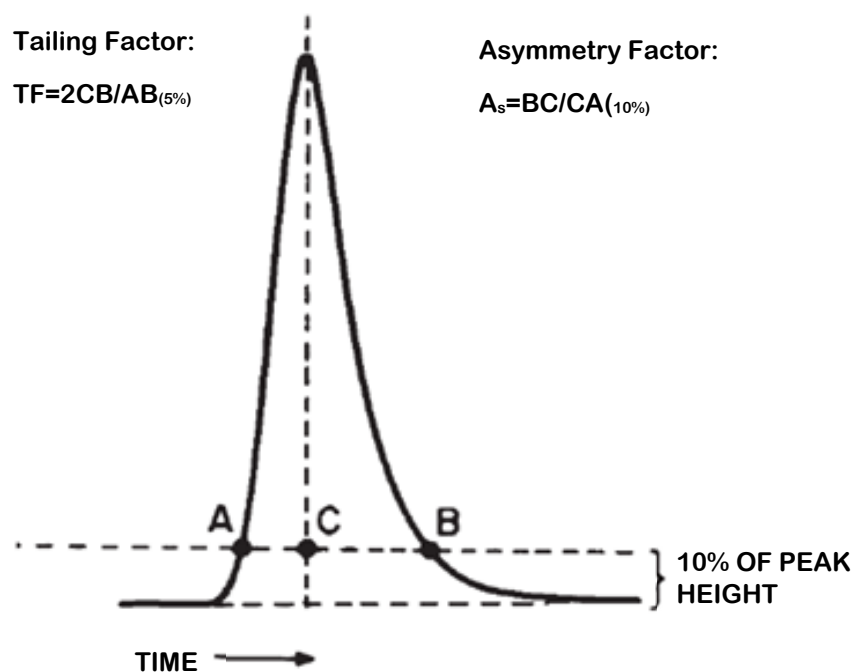

Figure S6: Equation for tailing factor calculation

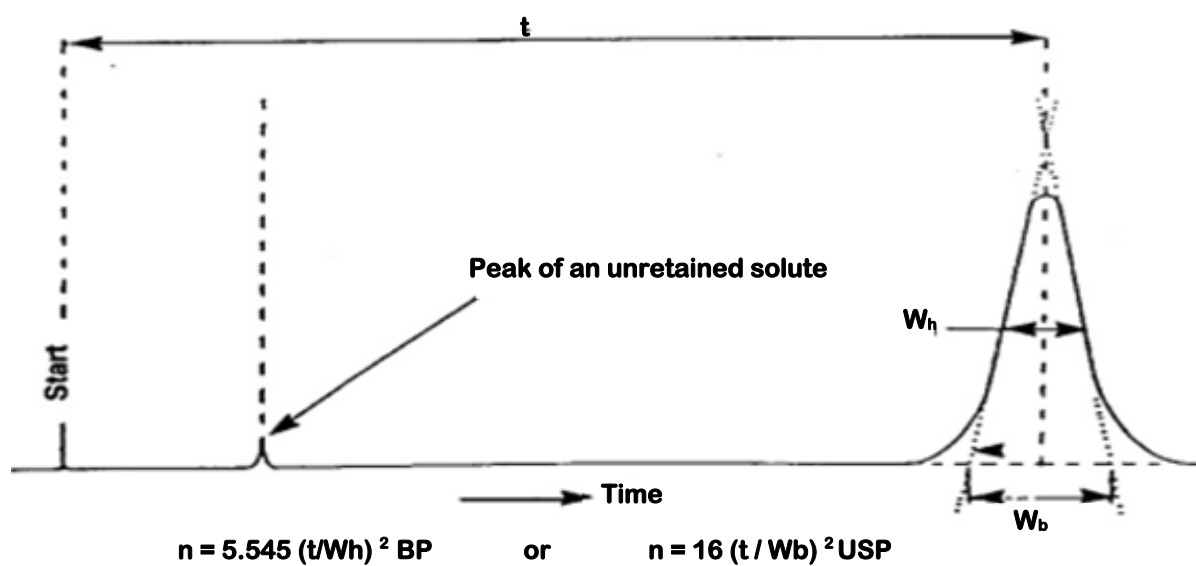

Figure S7 : Equation for the calculation of theoretical plate.

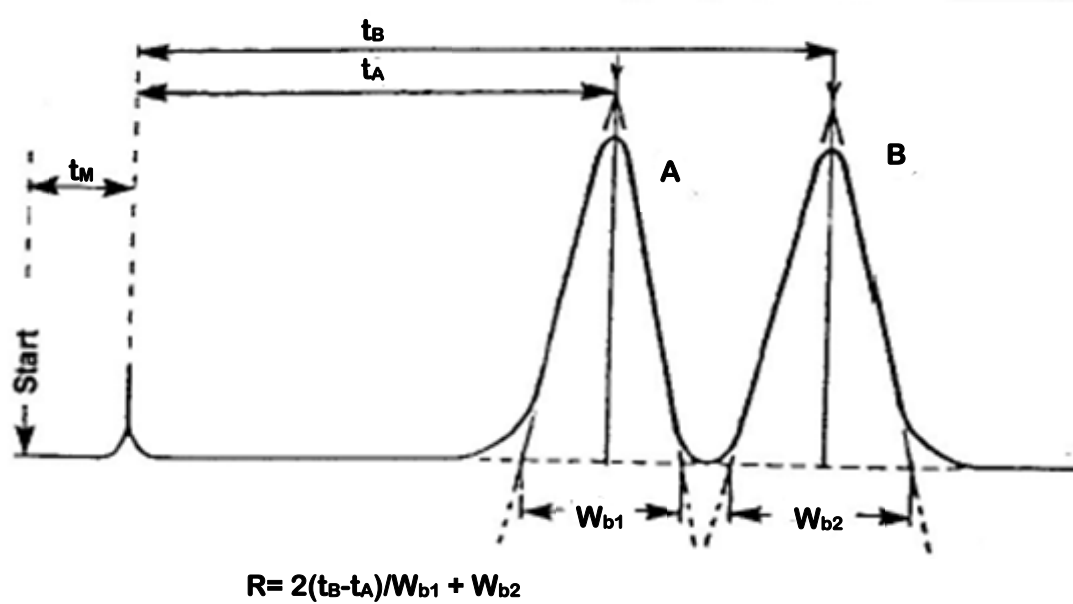

Figure S8: Equation for calculation of resolution
